# Supplementary material for: The marine n-3 PUFA DHA evokes cytoprotection against oxidative stress and protein misfolding by inducing autophagy and NFE2L2 in human retinal pigment epithelial cells
Source: PubMed Central journal article supplement — Autophagy. 2015 Aug 3;11(9):1636–51. doi: 10.1080/15548627.2015.1061170 (PMC4590664; doi:10.1080/15548627.2015.1061170), 2015-08-03
Supplement: kaup-11-09-1061170-s001.pdf [file kaup-11-09-1061170-s001.pdf]

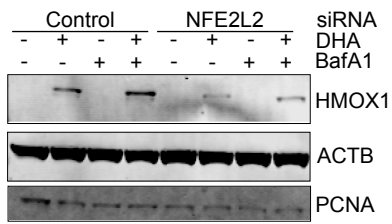

**Figure S2.** The level of the NFE2L2 target-protein HMOX1 (heme oxygenase 1) is reduced when NFE2L2 is downregulated. The cells were transfected with control or NFE2L2 siRNA (25 nM) and left for 24 h before reseeding. Following incubation for 24 h, the cells were added DHA (70  $\mu$ M) or BafA1 (100 nM) for 24 h. Immunoblot for HMOX1. ACTB/b-actin and PCNA were used as loading controls.
