# Supplementary material for: The marine n-3 PUFA DHA evokes cytoprotection against oxidative stress and protein misfolding by inducing autophagy and NFE2L2 in human retinal pigment epithelial cells
Source: PubMed Central journal article supplement — Autophagy. 2015 Aug 3;11(9):1636–51. doi: 10.1080/15548627.2015.1061170 (PMC4590664; doi:10.1080/15548627.2015.1061170), 2015-08-03
Supplement: kaup-11-09-1061170-s002.pdf [file kaup-11-09-1061170-s002.pdf]

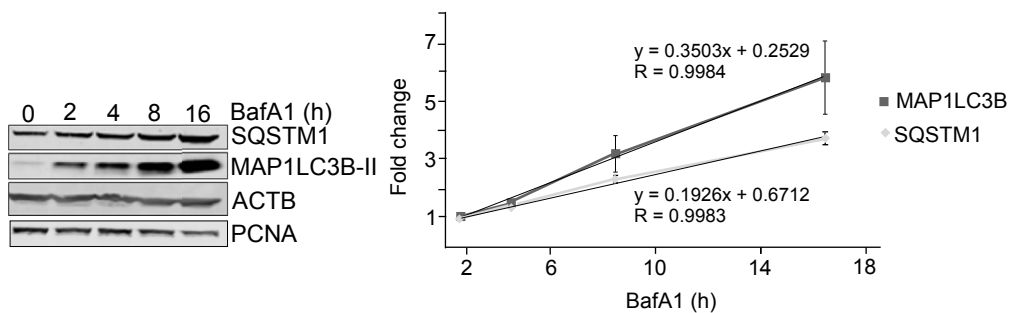

**Figure S1.** The autophagic turnover rate of SQSTM1 and MAP1LC3B in ARPE-19 cells. (A) The ARPE-19 cells were treated with BafA1 (100 nM) for the indicated time points. Equal amounts of protein (20  $\mu$ g) was loaded for each condition and immunoblotted for SQSTM1 and MAP1LC3B.  $\beta$ -actin (ACTB) and PCNA were used as loading controls. (B) The half-lives of SQSTM1 and MAP1LC3B were quantified using the regression line from the average fold change from four independent experiments. BafA1 treatment for 2 h was set to 1. R represents the correlation coefficient.
